# Supplementary material
Source: Springer Nature journal article supplement (https://www.springermedizin.de/resource/supplementary/13075_2009_2773_MOESM4_ESM.pdf/9692856)

Begg's funnel plot with pseudo 90% confidence limits

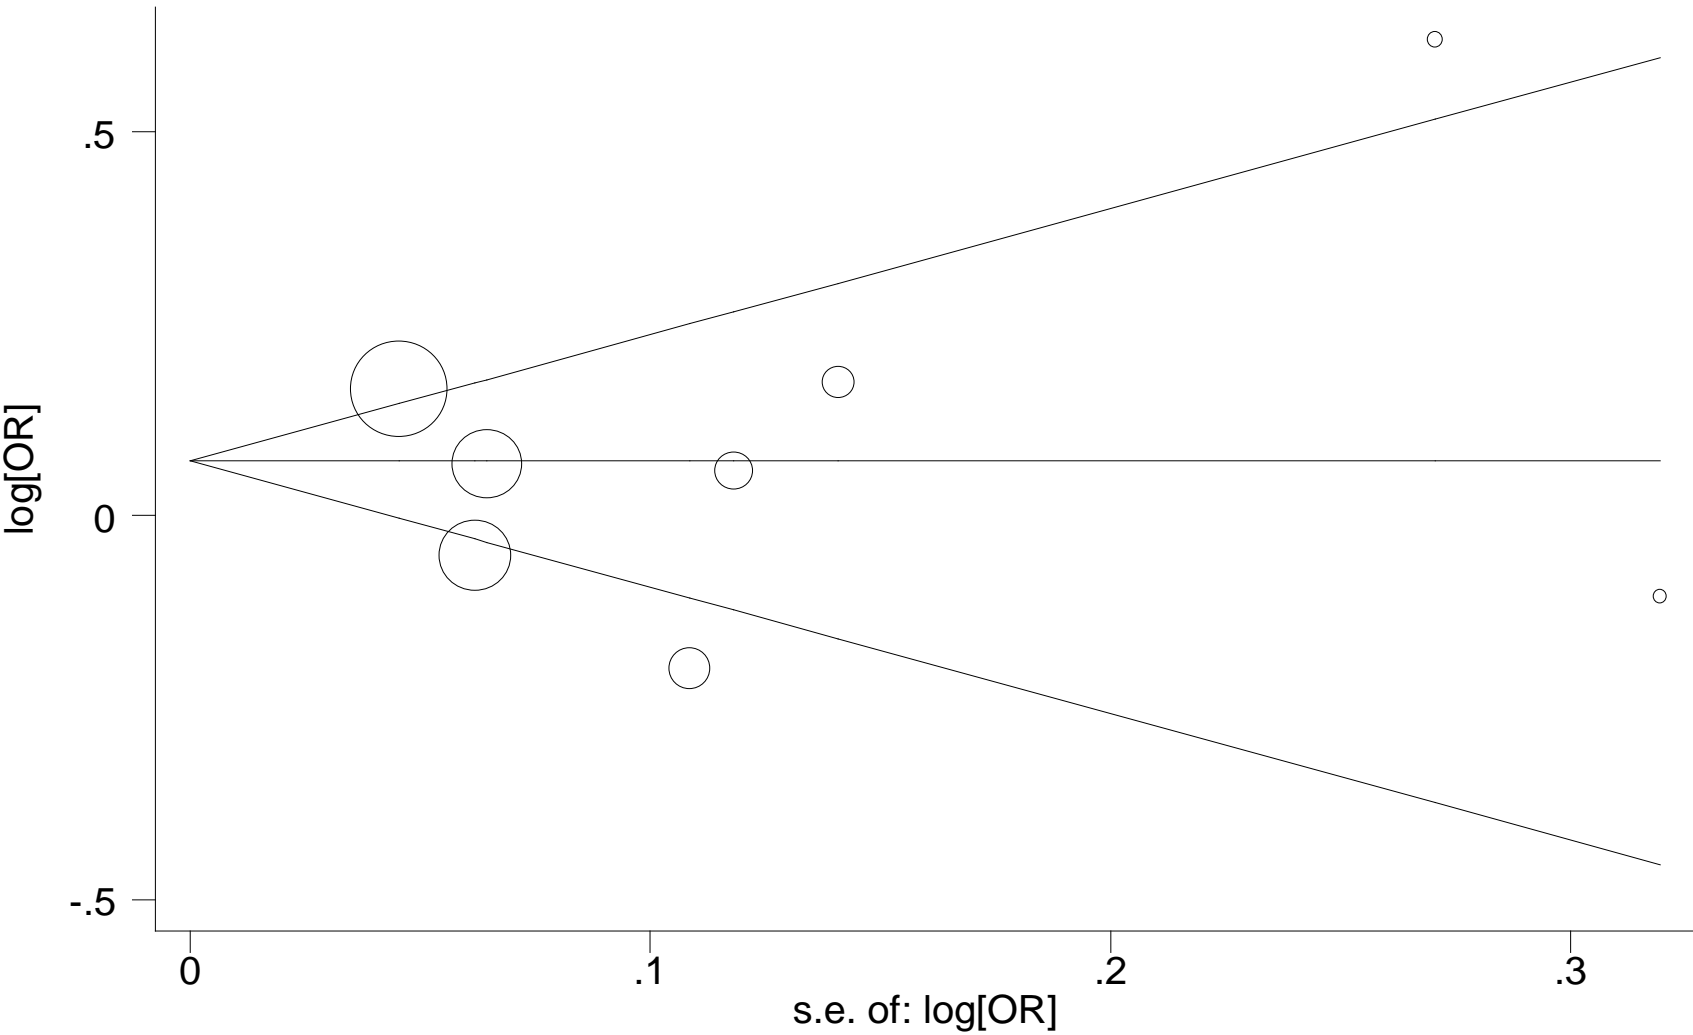

Supplement: MOESM4 [file 9692856]
